# Supplementary material
Source: PubMed Central journal article supplement (PMC9618258)
Supplement: NIHMS1841565-supplement-1.pdf [file NIHMS1841565-supplement-1.pdf]

# Supplementary Figures

Raw

Trimmed

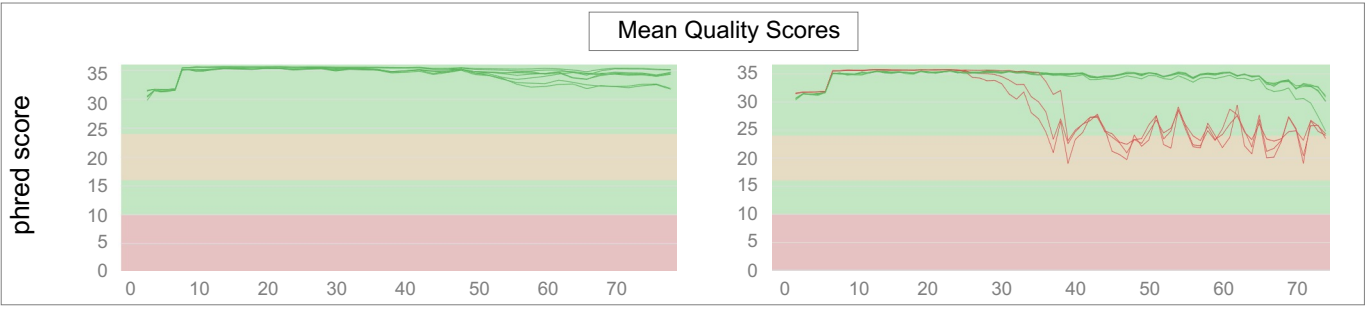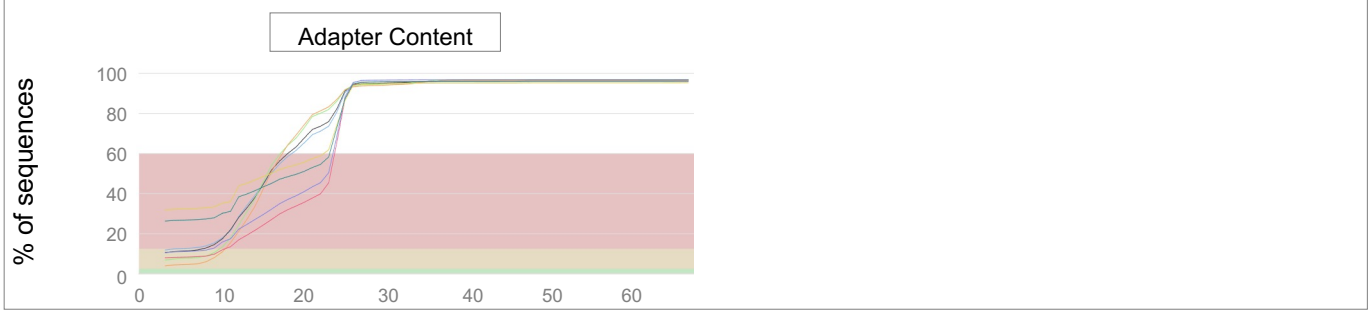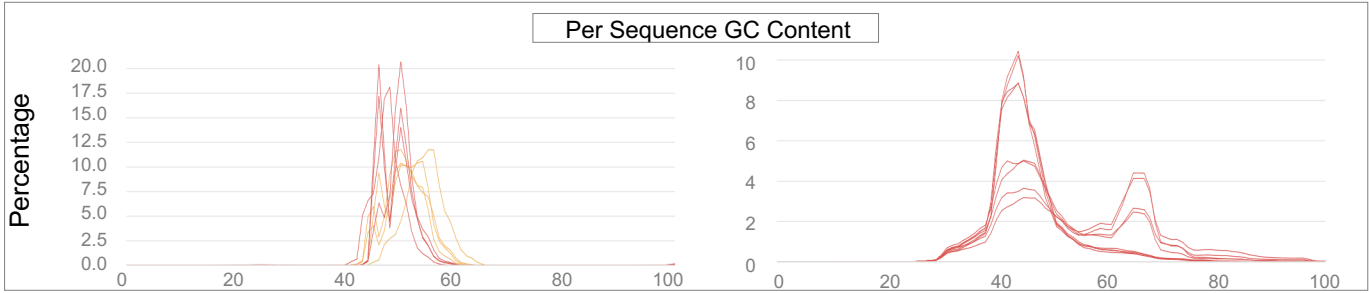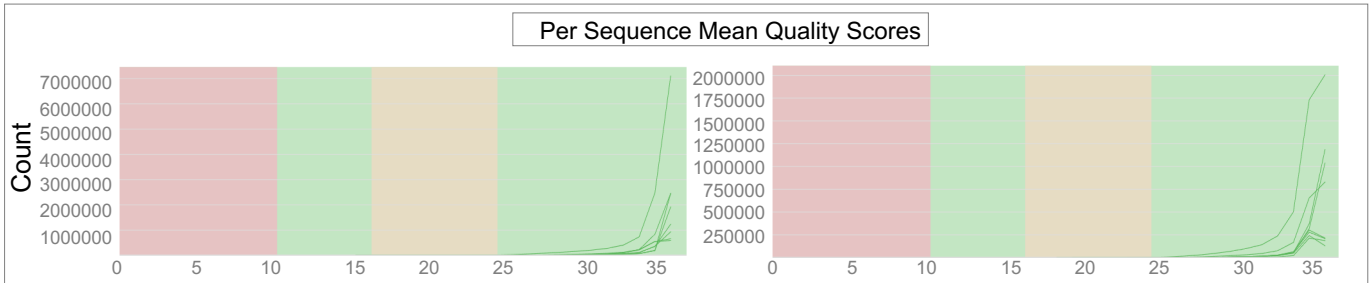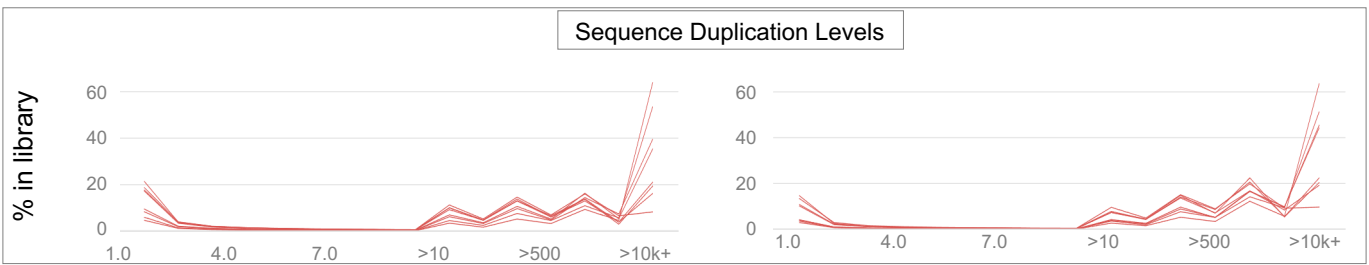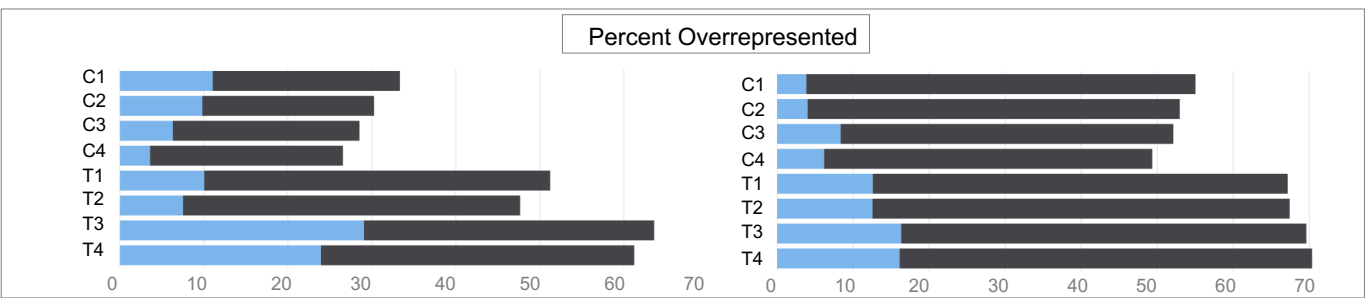

Raw

Trimmed

Mean Quality Scores

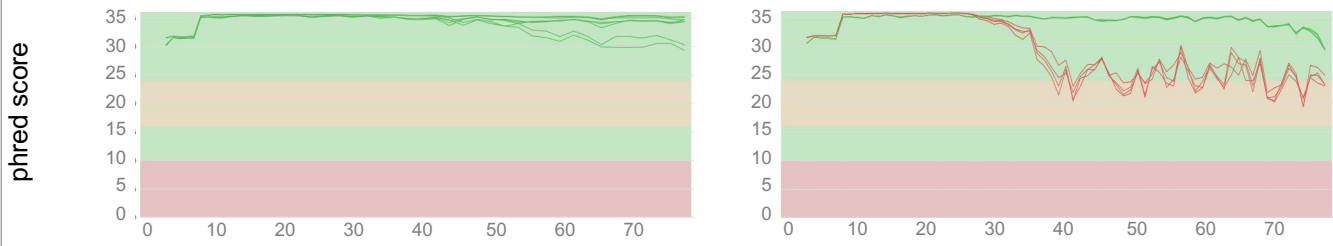

Adapter Content

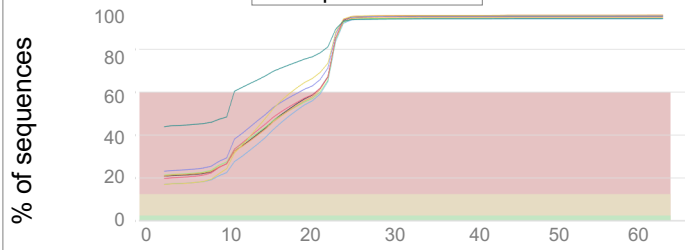

Per Sequence GC Content

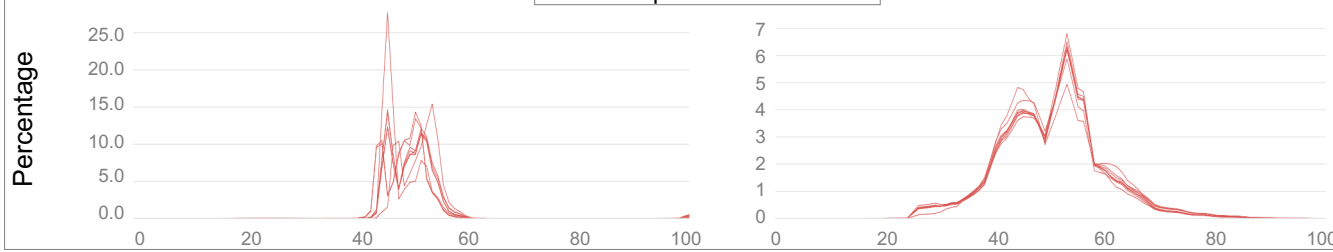

Per Sequence Mean Quality Scores

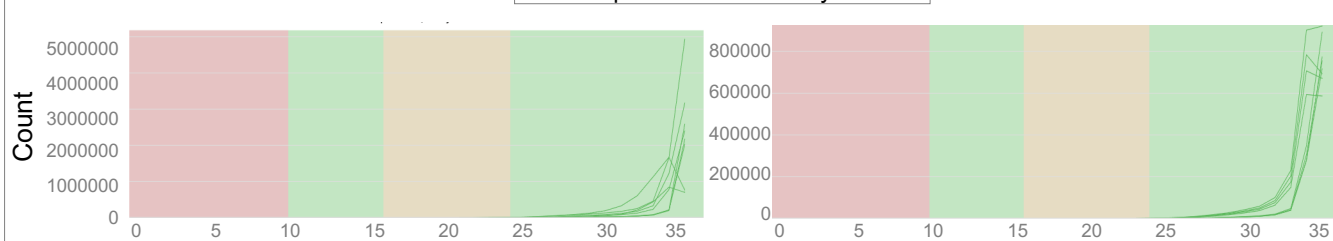

Sequence Duplication Levels

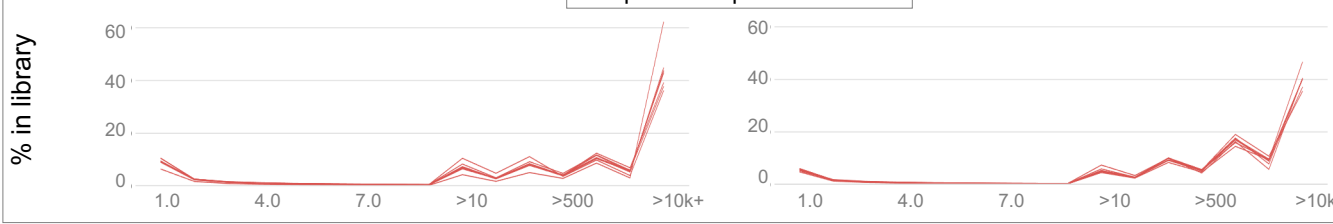

Percent Overrepresented

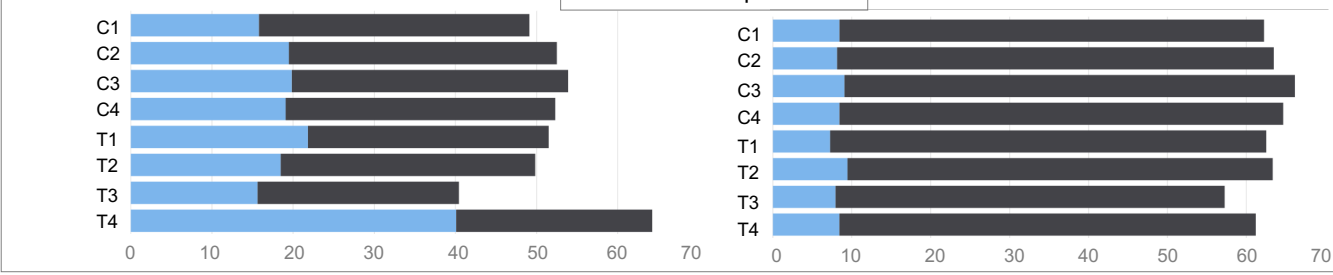

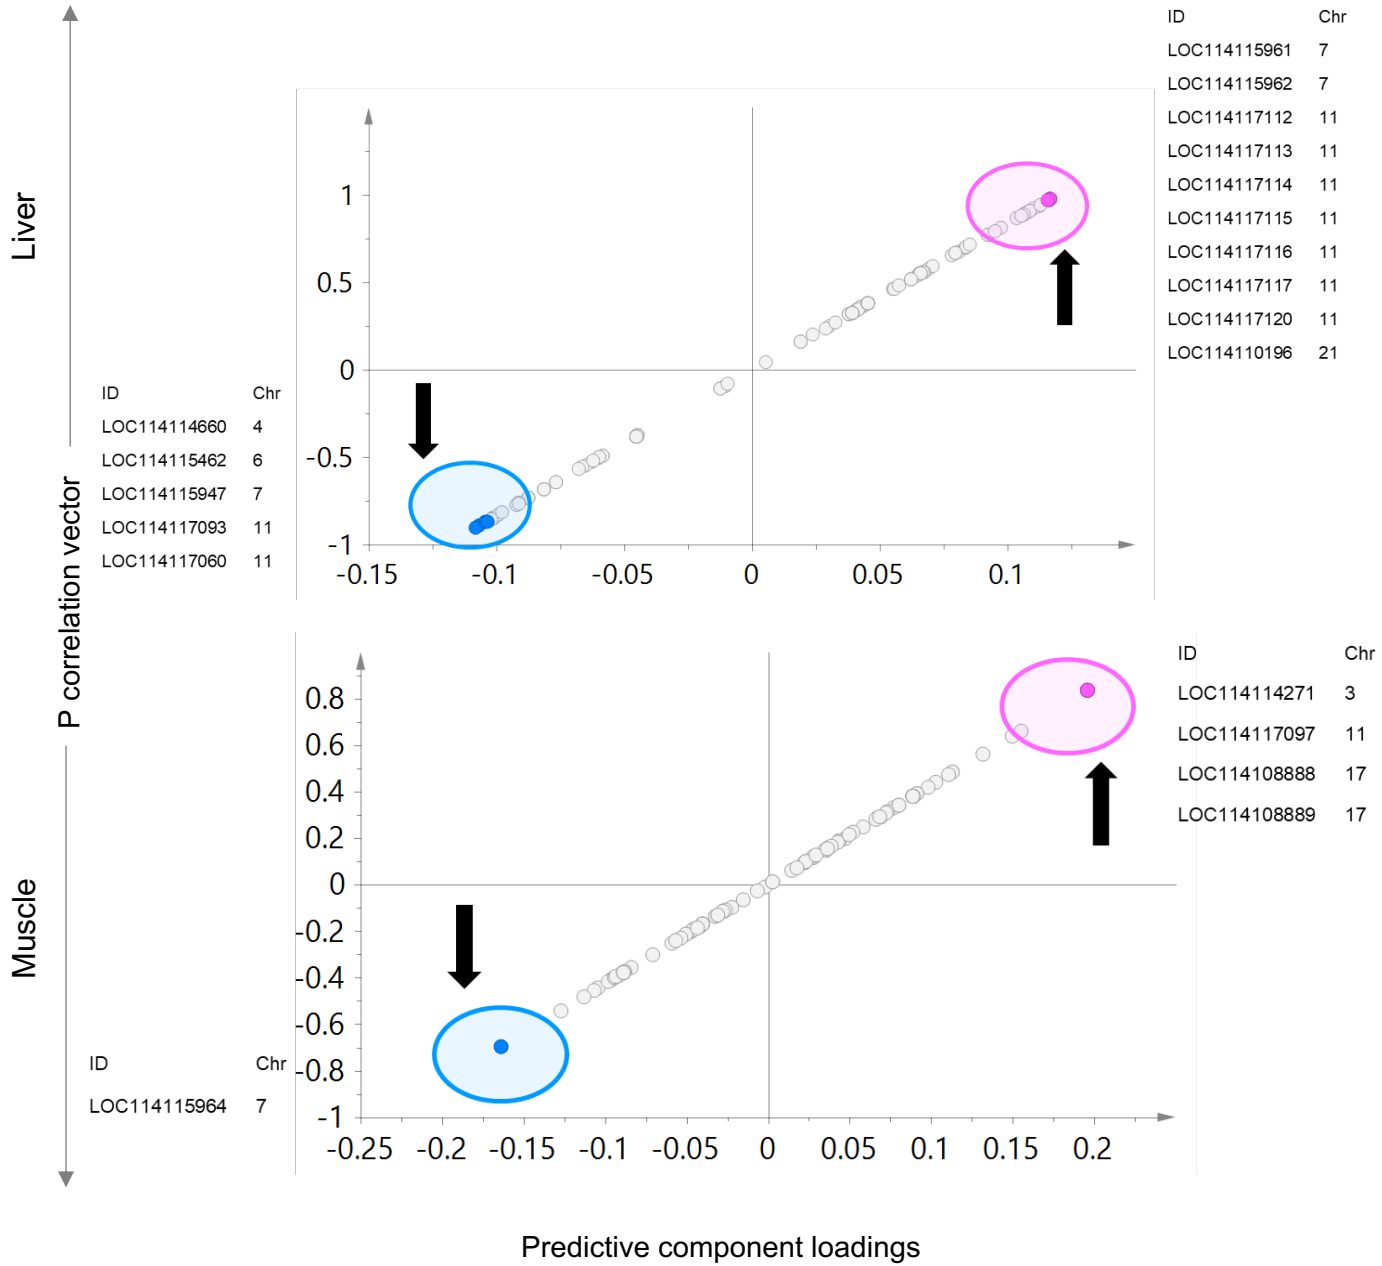

Supplementary Figure 3 : Liver and Muscle snRNA OPLS DA S-plot.
